# Supplementary material for: Cannabidiol Modulates Alterations in PFC microRNAs in a Rat Model of Depression
Source: MDPI journal article supplement (doi:10.3390/ijms24032052), 2023-01-20
Supplement: s1 [file s1]

## Supplementary information

**Table S1: UCMS schedule**

|        |                        | S     | M     | T     | W     | T     | F     | S    |
|--------|------------------------|-------|-------|-------|-------|-------|-------|------|
| Week 1 | Food deprivation       | 13 ▶  | 9     |       | 13 ▶  | 9     |       |      |
|        | Water deprivation      |       |       | 16 ▶  | 10    |       | 16 ▶  | 10   |
|        | Empty water bottle     |       |       |       | 10-11 |       |       |      |
|        | Cage tilt 45°          |       | 16 ▶  | 9     |       |       | 16 ▶  | 9    |
|        | Overnight illumination | 18 ▶  | 7     |       |       | 18 ▶  | 7     |      |
|        | Soiled cage            |       |       |       |       | 12 ▶  | 9     |      |
|        | Physical restraint     | 10-12 |       |       |       |       | 10-12 |      |
|        | Pair-housing           |       |       |       | 10 ▶  | 10    |       | 10 ▶ |
|        |                        | S     | M     | T     | W     | T     | F     | S    |
| Week 2 | Food deprivation       | 13 ▶  | 9     |       | 13 ▶  | 9     |       |      |
|        | Water deprivation      |       | 16 ▶  | 10    |       | 16 ▶  | 10    |      |
|        | Empty water bottle     |       |       | 10-11 |       |       |       |      |
|        | Cage tilt 45°          | 16 ▶  | 9     |       | 16 ▶  | 9     |       |      |
|        | Overnight illumination |       | 18 ▶  | 7     |       | 18 ▶  | 7     |      |
|        | Soiled cage            |       |       | 12 ▶  | 9     |       |       |      |
|        | Physical restraint     |       | 10-12 |       | 10-12 |       |       |      |
|        | Pair-housing           | ▶ 10  |       | 10 ▶  | 10    |       |       |      |
|        |                        | S     | M     | T     | W     | T     | F     | S    |
| Week 3 | Food deprivation       |       | 13 ▶  | 9     |       | 13 ▶  | 9     |      |
|        | Water deprivation      | 16 ▶  | 10    |       | 16 ▶  | 10    |       |      |
|        | Empty water bottle     |       |       |       |       | 10-11 |       |      |
|        | Cage tilt 45°          | 16 ▶  | 9     |       |       | 16 ▶  | 9     |      |
|        | Overnight illumination |       | 18 ▶  | 7     | 18 ▶  | 7     |       |      |
|        | Soiled cage            |       |       | 12 ▶  | 9     |       |       |      |
|        | Physical restraint     | 10-12 |       |       | 10-12 |       |       |      |
|        | Pair-housing           |       |       |       |       |       | 10 ▶  | 10   |
|        |                        | S     | M     | T     | W     | T     | F     | S    |
| Week 4 | Food deprivation       | 13 ▶  | 9     |       | 13 ▶  | 9     |       |      |
|        | Water deprivation      |       |       | 16 ▶  | 10    |       | 16 ▶  | 10   |
|        | Empty water bottle     |       |       |       | 10-11 |       |       |      |
|        | Cage tilt 45°          |       | 16 ▶  | 9     |       |       | 16 ▶  | 9    |
|        | Overnight illumination | 18 ▶  | 7     |       |       | 18 ▶  | 7     |      |
|        | Soiled cage            |       |       |       |       | 12 ▶  | 9     |      |
|        | Physical restraint     | 10-12 |       |       |       |       | 10-12 |      |
|        | Pair-housing           |       |       |       | 10 ▶  | 10    |       | 10 ▶ |
|        |                        | S     | M     | T     | W     | T     | F     | S    |
| Week 5 | Food deprivation       | 13 ▶  | 9     |       | 13 ▶  | 9     |       |      |
|        | Water deprivation      |       | 16 ▶  | 10    |       | 16 ▶  | 10    |      |
|        | Empty water bottle     |       |       | 10-11 |       |       |       |      |
|        | Cage tilt 45°          | 16 ▶  | 9     |       | 16 ▶  | 9     |       |      |
|        | Overnight illumination |       | 18 ▶  | 7     |       | 18 ▶  | 7     |      |
|        | Soiled cage            |       |       | 12 ▶  | 9     |       |       |      |
|        | Physical restraint     |       | 10-12 |       | 10-12 |       |       |      |
|        | Pair-housing           | ▶ 10  |       | 10 ▶  | 10    |       |       |      |
|        |                        | S     | M     | T     | W     | T     | F     | S    |
| Week 6 | Food deprivation       |       | 13 ▶  | 9     |       | 13 ▶  | 9     |      |
|        | Water deprivation      | 16 ▶  | 10    |       | 16 ▶  | 10    |       |      |
|        | Empty water bottle     |       |       |       |       | 10-11 |       |      |
|        | Cage tilt 45°          | 16 ▶  | 9     |       |       | 16 ▶  | 9     |      |
|        | Overnight illumination |       | 18 ▶  | 7     | 18 ▶  | 7     |       |      |
|        | Soiled cage            |       |       | 12 ▶  | 9     |       |       |      |
|        | Physical restraint     | 10-12 |       |       | 10-12 |       |       |      |
|        | Pair-housing           |       |       |       |       |       | 10 ▶  | 10   |

The arrow indicates the duration of the stressor

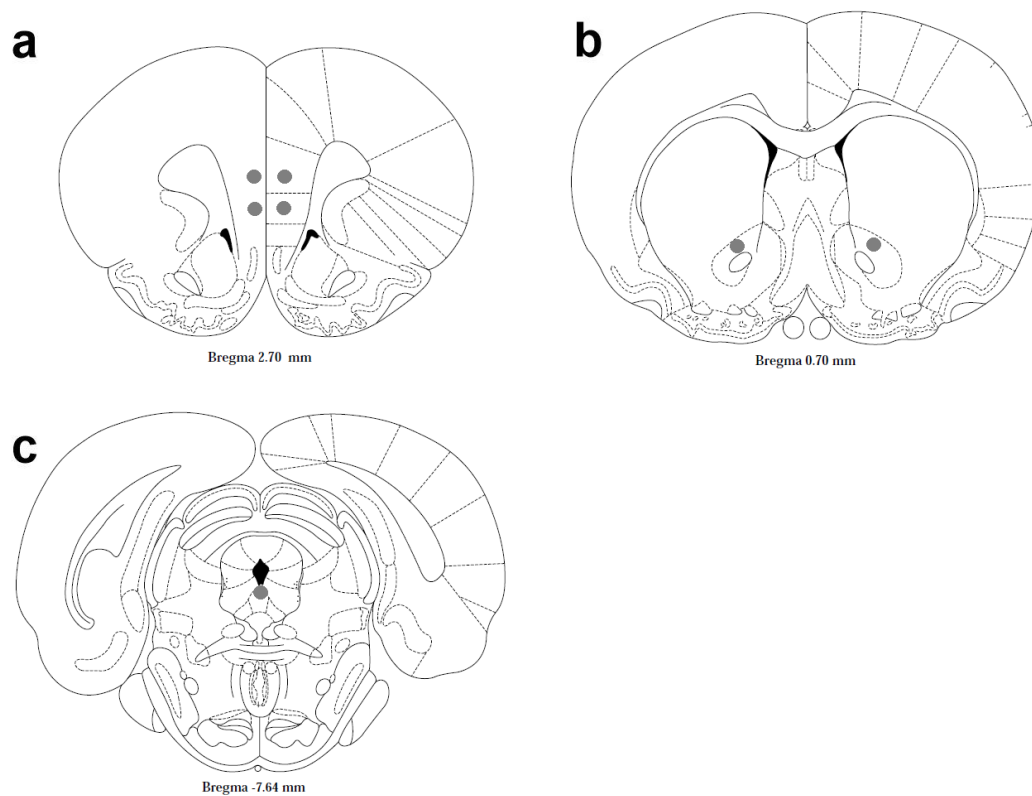

**Figure S1:** Rat brain atlas illustrations indicating punch locations. The numbers refer to the distance from Bregma. Bilateral punches (1mm diameter) were obtained from the (a) vmPFC (b) NAc and (c) raphe nucleus.
